# Supplementary material
Source: ML conference proceedings conference paper supplement (https://proceedings.mlr.press/v70/shen17a.html)
Supplement: Supplementary file [file shen17a-supp.pdf]

## A. Technical Lemmas

The following lemma is a characterization of the co-coercivity of the objective function  $F(\mathbf{x})$ . A similar result was obtained in [Nguyen et al. \(2014, Corollary 8\)](#) but we present a refined analysis which is essential for our purpose.

**Lemma 9.** *For a given support set  $\Omega$ , assume that the continuous function  $F(\mathbf{x})$  is  $M_{|\Omega|}$ -RSS and is  $m_K$ -RSC for some sparsity level  $K$ . Then, for all vectors  $\mathbf{w}$  and  $\mathbf{w}'$  with  $|\text{supp}(\mathbf{w} - \mathbf{w}') \cup \Omega| \leq K$ , we have*

$$\|\nabla_{\Omega} F(\mathbf{w}') - \nabla_{\Omega} F(\mathbf{w})\|^2 \leq 2M_{|\Omega|}(F(\mathbf{w}') - F(\mathbf{w}) - \langle \nabla F(\mathbf{w}), \mathbf{w}' - \mathbf{w} \rangle).$$

*Proof.* We define an auxiliary function

$$G(\mathbf{x}) \stackrel{\text{def}}{=} F(\mathbf{x}) - \langle \nabla F(\mathbf{w}), \mathbf{x} \rangle.$$

For all vectors  $\mathbf{x}$  and  $\mathbf{y}$ , we have

$$\|\nabla G(\mathbf{x}) - \nabla G(\mathbf{y})\| = \|\nabla F(\mathbf{x}) - \nabla F(\mathbf{y})\| \leq M_{|\text{supp}(\mathbf{x}-\mathbf{y})|} \|\mathbf{x} - \mathbf{y}\|,$$

which is equivalent to

$$G(\mathbf{x}) - G(\mathbf{y}) - \langle \nabla G(\mathbf{y}), \mathbf{x} - \mathbf{y} \rangle \leq \frac{M_r}{2} \|\mathbf{x} - \mathbf{y}\|^2, \quad (7)$$

where  $r = |\text{supp}(\mathbf{x} - \mathbf{y})|$ . On the other hand, due to the RSC property of  $F(\mathbf{x})$ , we obtain

$$G(\mathbf{x}) - G(\mathbf{w}) = F(\mathbf{x}) - F(\mathbf{w}) - \langle \nabla F(\mathbf{w}), \mathbf{x} - \mathbf{w} \rangle \geq \frac{m_{|\text{supp}(\mathbf{x}-\mathbf{w})|}}{2} \|\mathbf{x} - \mathbf{w}\|^2 \geq 0,$$

provided that  $|\text{supp}(\mathbf{x} - \mathbf{w})| \leq K$ . For the given support set  $\Omega$ , we pick  $\mathbf{x} = \mathbf{w}' - \frac{1}{M_{|\Omega|}} \nabla_{\Omega} G(\mathbf{w}')$ . Clearly, for such a choice of  $\mathbf{x}$ , we have  $\text{supp}(\mathbf{x} - \mathbf{w}) = \text{supp}(\mathbf{w} - \mathbf{w}') \cup \Omega$ . Hence, by assuming that  $|\text{supp}(\mathbf{w} - \mathbf{w}') \cup \Omega|$  is not larger than  $K$ , we get

$$\begin{aligned} G(\mathbf{w}) &\leq G\left(\mathbf{w}' - \frac{1}{M_{|\Omega|}} \nabla_{\Omega} G(\mathbf{w}')\right) \\ &\stackrel{(7)}{\leq} G(\mathbf{w}') + \left\langle \nabla G(\mathbf{w}'), -\frac{1}{M_{|\Omega|}} \nabla_{\Omega} G(\mathbf{w}') \right\rangle + \frac{1}{2M_{|\Omega|}} \|\nabla_{\Omega} G(\mathbf{w}')\|^2 \\ &= G(\mathbf{w}') - \frac{1}{2M_{|\Omega|}} \|\nabla_{\Omega} G(\mathbf{w}')\|^2. \end{aligned}$$

Now expanding  $\nabla_{\Omega} G(\mathbf{w}')$  and rearranging the terms give the desired result.  $\square$

**Lemma 10** (Lemma 1 in [Wang et al. \(2016\)](#)). *Let  $\mathbf{u}$  and  $\mathbf{z}$  be two distinct vectors and let  $W = \text{supp}(\mathbf{u}) \cap \text{supp}(\mathbf{z})$ . Also, let  $U$  be the support set of the top  $r$  (in magnitude) elements in  $\mathbf{u}$ . Then, the following holds for all  $r \geq 1$ :*

$$\langle \mathbf{u}, \mathbf{z} \rangle \leq \sqrt{\left\lceil \frac{|W|}{r} \right\rceil} \|\mathbf{u}_U\| \cdot \|\mathbf{z}_W\|.$$

**Lemma 11.** *Suppose that  $F(\mathbf{x})$  is  $m_K$ -restricted strongly convex and  $M_K$ -restricted smooth for some sparsity level  $K > 0$ . Then for all  $\eta > 0$ , all vectors  $\mathbf{x}, \mathbf{x}' \in \mathbb{R}^d$  and for any Hessian matrix  $\mathbf{H}$  of  $F(\mathbf{x})$ , we have*

$$|\langle \mathbf{x}, (\mathbf{I} - \eta \mathbf{H}) \mathbf{x}' \rangle| \leq \rho \|\mathbf{x}\| \cdot \|\mathbf{x}'\|, \quad \text{if } |\text{supp}(\mathbf{x}) \cup \text{supp}(\mathbf{x}')| \leq K,$$

and

$$\|((\mathbf{I} - \eta \mathbf{H}) \mathbf{x})_S\| \leq \rho \|\mathbf{x}\|, \quad \text{if } |S \cup \text{supp}(\mathbf{x})| \leq K,$$

where

$$\rho = \max \{ |\eta m_K - 1|, |\eta M_K - 1| \}.$$

*Proof.* Since  $\mathbf{H}$  is a Hessian matrix, we always have a decomposition  $\mathbf{H} = \mathbf{A}^\top \mathbf{A}$  for some matrix  $\mathbf{A}$ . Denote  $T = \text{supp}(\mathbf{x}) \cup \text{supp}(\mathbf{y})$ . By simple algebra, we have

$$\begin{aligned} |\langle \mathbf{x}, (\mathbf{I} - \eta \mathbf{H}) \mathbf{x}' \rangle| &= |\langle \mathbf{x}, \mathbf{x}' \rangle - \eta \langle \mathbf{A} \mathbf{x}, \mathbf{A} \mathbf{x}' \rangle| \\ &\stackrel{\zeta_1}{\leq} |\langle \mathbf{x}, \mathbf{x}' \rangle - \eta \langle \mathbf{A}_T \mathbf{x}, \mathbf{A}_T \mathbf{x}' \rangle| \\ &= \left| \left\langle \mathbf{x}, (\mathbf{I} - \eta \mathbf{A}_T^\top \mathbf{A}_T) \mathbf{x}' \right\rangle \right| \\ &\leq \left\| \mathbf{I} - \eta \mathbf{A}_T^\top \mathbf{A}_T \right\| \cdot \|\mathbf{x}\| \cdot \|\mathbf{x}'\| \\ &\stackrel{\zeta_2}{\leq} \max\{|\eta m_K - 1|, |\eta M_K - 1|\} \cdot \|\mathbf{x}\| \cdot \|\mathbf{x}'\|. \end{aligned}$$

Here,  $\zeta_1$  follows from the fact that  $\text{supp}(\mathbf{x}) \cup \text{supp}(\mathbf{y}) = T$  and  $\zeta_2$  holds because the RSC and RSS properties imply that the singular values of any Hessian matrix restricted on an  $K$ -sparse support set are lower and upper bounded by  $m_K$  and  $M_K$ , respectively.

For some index set  $S$  subject to  $|S \cup \text{supp}(\mathbf{x})| \leq K$ , let  $\mathbf{x}' = ((\mathbf{I} - \eta \mathbf{H}) \mathbf{x})_S$ . We immediately obtain

$$\|\mathbf{x}'\|^2 = \langle \mathbf{x}', (\mathbf{I} - \eta \mathbf{H}) \mathbf{x} \rangle \leq \rho \|\mathbf{x}'\| \cdot \|\mathbf{x}\|,$$

indicating

$$\|((\mathbf{I} - \eta \mathbf{H}) \mathbf{x})_S\| \leq \rho \|\mathbf{x}\|.$$

□

**Lemma 12.** *Suppose that  $F(\mathbf{x})$  is  $m_K$ -restricted strongly convex and  $M_K$ -restricted smooth for some sparsity level  $K > 0$ . For all  $\eta > 0$ , all vectors  $\mathbf{x}, \mathbf{x}' \in \mathbb{R}^d$  and support set  $T$  such that  $|\text{supp}(\mathbf{x} - \mathbf{x}') \cup T| \leq K$ , the following holds:*

$$\|(\mathbf{x} - \mathbf{x}' - \eta \nabla F(\mathbf{x}) + \eta \nabla F(\mathbf{x}'))_T\| \leq \rho \|\mathbf{x} - \mathbf{x}'\|$$

where  $\rho$  is given in Lemma 11.

*Proof.* In fact, for any two vectors  $\mathbf{x}$  and  $\mathbf{x}'$ , there always exists a quantity  $\theta \in [0, 1]$ , such that

$$\nabla F(\mathbf{x}) - \nabla F(\mathbf{x}') = \nabla^2 F(\theta \mathbf{x} + (1 - \theta) \mathbf{x}') (\mathbf{x} - \mathbf{x}').$$

Let  $\mathbf{H} = \nabla^2 F(\theta \mathbf{x} + (1 - \theta) \mathbf{x}')$ . We write

$$\begin{aligned} \|(\mathbf{x} - \mathbf{x}' - \eta \nabla F(\mathbf{x}) + \eta \nabla F(\mathbf{x}'))_T\| &= \|(\mathbf{x} - \mathbf{x}' - \eta \mathbf{H}(\mathbf{x} - \mathbf{x}'))_T\| \\ &= \|((\mathbf{I} - \eta \mathbf{H})(\mathbf{x} - \mathbf{x}'))_T\| \\ &\leq \rho \|\mathbf{x} - \mathbf{x}'\|, \end{aligned}$$

where the last inequality applies Lemma 11. □

**Lemma 13.** *Suppose that  $\mathbf{x}$  is a  $k$ -sparse vector and let  $\mathbf{b} = \mathbf{x} - \eta \nabla F(\mathbf{x})$ . Let  $T$  be the support set that contains the  $k$  largest absolute values of  $\mathbf{b}$ . Assume that the function  $F(\mathbf{x})$  is  $M_{2k}$ -restricted smooth, then we have the following:*

$$F(\mathbf{b}_T) \leq F(\mathbf{x}) - \frac{1 - \eta M_{2k}}{2\eta} \|\mathbf{b}_T - \mathbf{x}\|^2.$$

*Proof.* The RSS condition implies that

$$\begin{aligned} F(\mathbf{b}_T) - F(\mathbf{x}) &\leq \langle \nabla F(\mathbf{x}), \mathbf{b}_T - \mathbf{x} \rangle + \frac{M_{2k}}{2} \|\mathbf{b}_T - \mathbf{x}\|^2 \\ &\leq -\frac{1}{2\eta} \|\mathbf{b}_T - \mathbf{x}\|^2 + \frac{M_{2k}}{2} \|\mathbf{b}_T - \mathbf{x}\|^2, \end{aligned}$$

where the second inequality is due to the fact that

$$\begin{aligned}\|\mathbf{b}_T - \mathbf{b}\|^2 &= \|\mathbf{b}_T - \mathbf{x} + \eta \nabla F(\mathbf{x})\|^2 \\ &\leq \|\mathbf{x} - \mathbf{x} + \eta \nabla F(\mathbf{x})\|^2 \\ &= \|\eta \nabla F(\mathbf{x})\|^2,\end{aligned}$$

implying

$$2\eta \langle \nabla F(\mathbf{x}), \mathbf{b}_T - \mathbf{x} \rangle \leq -\|\mathbf{b}_T - \mathbf{x}\|^2.$$

□

**Lemma 14.** *Suppose that  $F(\mathbf{x})$  is  $m_K$ -RSC. Then for any vectors  $\mathbf{x}$  and  $\mathbf{x}'$  with  $\|\mathbf{x} - \mathbf{x}'\|_0 \leq K$ , the following holds:*

$$\|\mathbf{x} - \mathbf{x}'\| \leq \sqrt{\frac{2 \max\{F(\mathbf{x}) - F(\mathbf{x}'), 0\}}{m_K}} + \frac{2 \|\nabla_T F(\mathbf{x}')\|}{m_K}$$

where  $T = \text{supp}(\mathbf{x} - \mathbf{x}')$ .

*Proof.* The RSC property immediately implies

$$\begin{aligned}F(\mathbf{x}) - F(\mathbf{x}') &\geq \langle \nabla F(\mathbf{x}'), \mathbf{x} - \mathbf{x}' \rangle + \frac{m_K}{2} \|\mathbf{x} - \mathbf{x}'\|^2 \\ &\geq -\|\nabla_T F(\mathbf{x}')\| \cdot \|\mathbf{x} - \mathbf{x}'\| + \frac{m_K}{2} \|\mathbf{x} - \mathbf{x}'\|^2.\end{aligned}$$

Discussing the sign of  $F(\mathbf{x}) - F(\mathbf{x}')$  and solving the above quadratic inequality completes the proof. □

**Lemma 15.** *Assume that  $F(\mathbf{x})$  is  $m_{k+s}$ -RSC and  $M_{2k}$ -RSS. Suppose that for all  $t \geq 0$ ,  $\mathbf{x}^t$  is  $k$ -sparse and the following holds:*

$$F(\mathbf{x}^{t+1}) - F(\bar{\mathbf{x}}) \leq \mu (F(\mathbf{x}^t) - F(\bar{\mathbf{x}})) + \tau,$$

where  $0 < \mu < 1$ ,  $\tau \geq 0$  and  $\bar{\mathbf{x}}$  is an arbitrary  $s$ -sparse signal. Then,

$$\|\mathbf{x}^t - \bar{\mathbf{x}}\| \leq \sqrt{\frac{2M}{m}} (\sqrt{\mu})^t \|\mathbf{x}^0 - \bar{\mathbf{x}}\| + \frac{3}{m} \|\nabla_{k+s} F(\bar{\mathbf{x}})\| + \sqrt{\frac{2\tau}{m(1-\mu)}}.$$

*Proof.* The RSS property implies that

$$\begin{aligned}F(\mathbf{x}^0) - F(\bar{\mathbf{x}}) &\leq \langle \nabla F(\bar{\mathbf{x}}), \mathbf{x}^0 - \bar{\mathbf{x}} \rangle + \frac{M}{2} \|\mathbf{x}^0 - \bar{\mathbf{x}}\|^2 \\ &\leq \frac{M}{2} \|\mathbf{x}^0 - \bar{\mathbf{x}}\|^2 + \frac{1}{2M} \|\nabla_{k+s} F(\bar{\mathbf{x}})\|^2 + \frac{M}{2} \|\mathbf{x}^0 - \bar{\mathbf{x}}\|^2 \\ &\leq M \|\mathbf{x}^0 - \bar{\mathbf{x}}\|^2 + \frac{1}{2M} \|\nabla_{k+s} F(\bar{\mathbf{x}})\|^2.\end{aligned}$$

Hence,

$$F(\mathbf{x}^t) - F(\bar{\mathbf{x}}) \leq \mu^t M \|\mathbf{x}^0 - \bar{\mathbf{x}}\|^2 + \frac{1}{2M} \|\nabla_{k+s} F(\bar{\mathbf{x}})\|^2 + \frac{\tau}{1-\mu}.$$

By Lemma 14, we have

$$\begin{aligned}
 \|\mathbf{x}^t - \bar{\mathbf{x}}\| &\leq \sqrt{\frac{2}{m}} \sqrt{\mu^t M \|\mathbf{x}^0 - \bar{\mathbf{x}}\|^2 + \frac{\|\nabla_{k+s} F(\bar{\mathbf{x}})\|^2}{2M}} + \frac{\tau}{1-\mu} + \frac{2}{m} \|\nabla_{k+s} F(\bar{\mathbf{x}})\| \\
 &\leq \sqrt{\frac{2M}{m}} (\sqrt{\mu})^t \|\mathbf{x}^0 - \bar{\mathbf{x}}\| + \sqrt{\frac{1}{mM}} \|\nabla_{k+s} F(\bar{\mathbf{x}})\| \\
 &\quad + \frac{2}{m} \|\nabla_{k+s} F(\bar{\mathbf{x}})\| + \sqrt{\frac{2\tau}{m(1-\mu)}} \\
 &\leq \sqrt{\frac{2M}{m}} (\sqrt{\mu})^t \|\mathbf{x}^0 - \bar{\mathbf{x}}\| + \frac{3}{m} \|\nabla_{k+s} F(\bar{\mathbf{x}})\| + \sqrt{\frac{2\tau}{m(1-\mu)}}.
 \end{aligned}$$

□

**Lemma 16.** Let  $\bar{\mathbf{x}} \in \mathbb{R}^d$  be an  $s$ -sparse vector supported on  $S$ . For a  $k$ -sparse vector  $\mathbf{x}$  supported on  $Q$  with  $k \geq s$ , let  $\mathbf{b} = \mathbf{x} - \eta \nabla F(\mathbf{x})$  and let  $T = \text{supp}(\mathbf{b}, k)$ . Suppose that the function  $F(\mathbf{x})$  is  $m_{2k+s}$ -RSC and  $M_{2k+s}$ -RSS. Then we have

$$\|\bar{\mathbf{x}}_{S \setminus T}\| \leq \nu \rho \|\mathbf{x} - \bar{\mathbf{x}}\| + \nu \eta \|\nabla_{T \Delta S} F(\bar{\mathbf{x}})\|,$$

where  $\nu = \sqrt{1 + s/k}$  and  $\rho$  is given by Lemma 11.

*Proof.* We note the fact that the support sets  $T \setminus S$  and  $S \setminus T$  are disjoint. Moreover, the set  $T \setminus S$  contains  $|T \setminus S|$  number of top  $|T|$  elements of  $\mathbf{b}$ . Hence, we have

$$\frac{1}{|T \setminus S|} \|\mathbf{b}_{T \setminus S}\|^2 \geq \frac{1}{|S \setminus T|} \|\mathbf{b}_{S \setminus T}\|^2. \quad (8)$$

That is,

$$\|\mathbf{b}_{T \setminus S}\| \geq \sqrt{\frac{|T \setminus S|}{|S \setminus T|}} \|\mathbf{b}_{S \setminus T}\| = \sqrt{\frac{k - |T \cap S|}{s - |T \cap S|}} \|\mathbf{b}_{S \setminus T}\| \geq \sqrt{\frac{k}{s}} \|\mathbf{b}_{S \setminus T}\|.$$

Note that the above holds also for  $T = S$ . Since  $\bar{\mathbf{x}}$  is supported on  $S$ , the left hand side reads as

$$\|\mathbf{b}_{T \setminus S}\| = \left\| (\mathbf{x} - \bar{\mathbf{x}} - \eta \nabla F(\mathbf{x}))_{T \setminus S} \right\|,$$

while the right hand side reads as

$$\begin{aligned}
 \|\mathbf{b}_{S \setminus T}\| &= \left\| (\mathbf{x} - \bar{\mathbf{x}} - \eta \nabla F(\mathbf{x}))_{S \setminus T} + \bar{\mathbf{x}}_{S \setminus T} \right\| \\
 &\geq \|\bar{\mathbf{x}}_{S \setminus T}\| - \left\| (\mathbf{x} - \bar{\mathbf{x}} - \eta \nabla F(\mathbf{x}))_{S \setminus T} \right\|.
 \end{aligned}$$

Denote  $\nu = \sqrt{1 + s/k}$ . In this way, we arrive at

$$\begin{aligned}
 \|\bar{\mathbf{x}}_{S \setminus T}\| &\leq \sqrt{\frac{s}{k}} \left( \left\| (\mathbf{x} - \bar{\mathbf{x}} - \eta \nabla F(\mathbf{x}))_{T \setminus S} \right\| + \left\| (\mathbf{x} - \bar{\mathbf{x}} - \eta \nabla F(\mathbf{x}))_{S \setminus T} \right\| \right) \\
 &\leq \nu \left\| (\mathbf{x} - \bar{\mathbf{x}} - \eta \nabla F(\mathbf{x}))_{T \Delta S} \right\| \\
 &\leq \nu \left\| (\mathbf{x} - \bar{\mathbf{x}} - \eta \nabla F(\mathbf{x}) + \eta \nabla F(\bar{\mathbf{x}}))_{T \Delta S} \right\| + \nu \eta \|\nabla_{T \Delta S} F(\bar{\mathbf{x}})\| \\
 &\leq \nu \left\| (\mathbf{x} - \bar{\mathbf{x}} - \eta \nabla F(\mathbf{x}) + \eta \nabla F(\bar{\mathbf{x}}))_{T \cup Q \cup S} \right\| + \nu \eta \|\nabla_{T \Delta S} F(\bar{\mathbf{x}})\| \\
 &\leq \nu \rho_{2k+s} \|\mathbf{x} - \bar{\mathbf{x}}\| + \nu \eta \|\nabla_{T \Delta S} F(\bar{\mathbf{x}})\|,
 \end{aligned}$$

where the second inequality follows from the fact that  $ax + by \leq \sqrt{a^2 + b^2} \sqrt{x^2 + y^2}$  and we applied Lemma 12 for the last inequality. □

**Lemma 17.** Consider the HTP algorithm with exact solutions. Assume (A1). Then

$$\|\nabla_{S^{t+1} \setminus S^t} F(\mathbf{x}^t)\|^2 \geq 2m\zeta (F(\mathbf{x}^t) - F(\bar{\mathbf{x}})),$$

where

$$\zeta = \frac{|S^{t+1} \setminus S^t|}{|S^{t+1} \setminus S^t| + |S \setminus S^t|}.$$

*Proof.* The lemma holds clearly for either  $S^{t+1} = S^t$  or  $F(\mathbf{x}^t) \leq F(\bar{\mathbf{x}})$ . Hence, in the following we only prove the result by assuming  $S^{t+1} \neq S^t$  and  $F(\mathbf{x}^t) > F(\bar{\mathbf{x}})$ . Due to the RSC property, we have

$$F(\bar{\mathbf{x}}) - F(\mathbf{x}^t) - \langle \nabla F(\mathbf{x}^t), \bar{\mathbf{x}} - \mathbf{x}^t \rangle \geq \frac{m_{k+s}}{2} \|\bar{\mathbf{x}} - \mathbf{x}^t\|^2,$$

which implies

$$\begin{aligned} \langle \nabla F(\mathbf{x}^t), -\bar{\mathbf{x}} \rangle &\geq \frac{m_{k+s}}{2} \|\bar{\mathbf{x}} - \mathbf{x}^t\|^2 + F(\mathbf{x}^t) - F(\bar{\mathbf{x}}) \\ &\geq \sqrt{2m_{k+s}} \|\bar{\mathbf{x}} - \mathbf{x}^t\| \sqrt{F(\mathbf{x}^t) - F(\bar{\mathbf{x}})}. \end{aligned}$$

By invoking Lemma 10 with  $\mathbf{u} = \nabla F(\mathbf{x}^t)$  and  $\mathbf{z} = -\bar{\mathbf{x}}$  therein, we have

$$\begin{aligned} \langle \nabla F(\mathbf{x}^t), -\bar{\mathbf{x}} \rangle &\leq \sqrt{\frac{|S \setminus S^t|}{|S^{t+1} \setminus S^t|} + 1} \|\nabla_{S^{t+1} \setminus S^t} F(\mathbf{x}^t)\| \cdot \|\bar{\mathbf{x}}_{S \setminus S^t}\| \\ &= \sqrt{\frac{|S \setminus S^t|}{|S^{t+1} \setminus S^t|} + 1} \|\nabla_{S^{t+1} \setminus S^t} F(\mathbf{x}^t)\| \cdot \|(\bar{\mathbf{x}} - \mathbf{x}^t)_{S \setminus S^t}\| \\ &\leq \sqrt{\frac{|S \setminus S^t|}{|S^{t+1} \setminus S^t|} + 1} \|\nabla_{S^{t+1} \setminus S^t} F(\mathbf{x}^t)\| \cdot \|\bar{\mathbf{x}} - \mathbf{x}^t\|. \end{aligned}$$

It is worth mentioning that the first inequality above holds because  $\nabla F(\mathbf{x}^t)$  is supported on  $\bar{S}^t$  and  $S^{t+1} \setminus S^t$  contains the  $|S^{t+1} \setminus S^t|$  number of largest (in magnitude) elements of  $\nabla F(\mathbf{x}^t)$ . Therefore, we obtain the result.  $\square$

## B. Proofs for Section 2

### B.1. Proof for Prop. 1

*Proof.* Due to the RSS property, we have

$$\begin{aligned} F(\mathbf{b}_{S^{t+1}}^{t+1}) - F(\mathbf{x}^t) &\leq \langle \nabla F(\mathbf{x}^t), \mathbf{b}_{S^{t+1}}^{t+1} - \mathbf{x}^t \rangle + \frac{M}{2} \|\mathbf{b}_{S^{t+1}}^{t+1} - \mathbf{x}^t\|^2 \\ &\stackrel{\zeta_1}{=} \langle \nabla_{S^{t+1} \setminus S^t} F(\mathbf{x}^t), \mathbf{b}_{S^{t+1} \setminus S^t}^{t+1} \rangle + \frac{M}{2} \left( \|\mathbf{b}_{S^{t+1} \setminus S^t}^{t+1}\|^2 \right. \\ &\quad \left. + \|\mathbf{b}_{S^{t+1} \cap S^t}^{t+1} - \mathbf{x}_{S^{t+1} \cap S^t}^t\|^2 + \|\mathbf{x}_{S^t \setminus S^{t+1}}^t\|^2 \right) \\ &\leq \langle \nabla_{S^{t+1} \setminus S^t} F(\mathbf{x}^t), \mathbf{b}_{S^{t+1} \setminus S^t}^{t+1} \rangle + M \|\mathbf{b}_{S^{t+1} \setminus S^t}^{t+1}\|^2 \\ &\stackrel{\zeta_3}{=} -\eta(1 - \eta M) \|\nabla_{S^{t+1} \setminus S^t} F(\mathbf{x}^t)\|^2. \end{aligned}$$

Above, we observe that  $\nabla F(\mathbf{x}^t)$  is supported on  $\bar{S}^t$  and we simply decompose the support set  $S^{t+1} \cup S^t$  into three mutually disjoint sets, and hence  $\zeta_1$  holds. To see why  $\zeta_2$  holds, we note that for any set  $\Omega \subset S^t$ ,  $\mathbf{b}_{\Omega}^{t+1} = \mathbf{x}_{\Omega}^t$ . Hence,  $\mathbf{b}_{S^{t+1} \cap S^t}^{t+1} = \mathbf{x}_{S^{t+1} \cap S^t}^t$ . Moreover, since  $\mathbf{x}_{S^t \setminus S^{t+1}}^t = \mathbf{b}_{S^t \setminus S^{t+1}}^{t+1}$  and any element in  $\mathbf{b}_{S^t \setminus S^{t+1}}^{t+1}$  is not larger than that in  $\mathbf{b}_{S^{t+1} \setminus S^t}^{t+1}$  (recall that  $S^{t+1}$  is obtained by hard thresholding), we have  $\|\mathbf{x}_{S^t \setminus S^{t+1}}^t\| \leq \|\mathbf{b}_{S^{t+1} \setminus S^t}^{t+1}\|$  where we use the fact that  $|S^t \setminus S^{t+1}| = |S^{t+1} \setminus S^t|$ . Therefore,  $\zeta_2$  holds. Finally, we write  $\mathbf{b}_{S^{t+1} \setminus S^t}^{t+1} = -\eta \nabla_{S^{t+1} \setminus S^t} F(\mathbf{x}^t)$  and obtain  $\zeta_3$ .

Since  $\mathbf{x}^{t+1}$  is a minimizer of  $F(\mathbf{x})$  over the support set  $S^{t+1}$ , it immediately follows that

$$F(\mathbf{x}^{t+1}) - F(\mathbf{x}^t) \leq F(\mathbf{b}_{S^{t+1}}^{t+1}) - F(\mathbf{x}^t) \leq -\eta(1 - \eta M) \|\nabla_{S^{t+1} \setminus S^t} F(\mathbf{x}^t)\|^2.$$

Now we invoke Lemma 17 and pick  $\eta \leq 1/M$ ,

$$F(\mathbf{x}^{t+1}) - F(\mathbf{x}^t) \leq \eta(\eta M - 1) \cdot \frac{2m}{1+s} (F(\mathbf{x}^t) - F(\bar{\mathbf{x}})),$$

which gives

$$F(\mathbf{x}^{t+1}) - F(\bar{\mathbf{x}}) \leq \beta (F(\mathbf{x}^t) - F(\bar{\mathbf{x}})),$$

where  $\beta = 1 - \frac{2m\eta(1-\eta M)}{1+s}$ . □

### B.2. Proof for Prop. 2

*Proof.* This is a direct result by combining Prop. 1 and Lemma 15. □

### B.3. Proof for Lemma 3

*Proof.* Let  $\mathbf{x}_*^t = \arg \min_{\text{supp}(\mathbf{x}) \subset S^t} F(\mathbf{x})$ . Since  $\mathbf{x}^t$  and  $\mathbf{x}_*^t$  are both supported on  $S^t$ , we apply Lemma 9 and obtain

$$\begin{aligned} \|\nabla_{S^t} F(\mathbf{x}^t)\|^2 &= \|\nabla_{S^t} F(\mathbf{x}^t) - \nabla_{S^t} F(\mathbf{x}_*^t)\|^2 \\ &\leq 2M (F(\mathbf{x}^t) - F(\mathbf{x}_*^t)) - \langle \nabla F(\mathbf{x}_*^t), \mathbf{x}^t - \mathbf{x}_*^t \rangle \\ &\leq 2M\epsilon. \end{aligned}$$

Above, the second inequality uses the fact that  $\nabla_{S^t} F(\mathbf{x}_*^t) = 0$  and  $F(\mathbf{x}^t) \leq F(\mathbf{x}_*^t) + \epsilon$ . □

### B.4. Proof for Prop. 4

*Proof.* We have by Lemma 16 that

$$\|\bar{\mathbf{x}}_{S^{t+1}}\| \leq \sqrt{2}\rho \|\mathbf{x}^t - \bar{\mathbf{x}}\| + \frac{2}{m} \|\nabla_{k+s} F(\bar{\mathbf{x}})\|,$$

where  $\rho = 1 - \eta m$ . On the other hand, Lemma 18 together with Lemma 3 shows that

$$\|\mathbf{x}^{t+1} - \bar{\mathbf{x}}\| \leq \kappa \|\bar{\mathbf{x}}_{S^{t+1}}\| + \frac{1}{m} \|\nabla_k F(\bar{\mathbf{x}})\| + \frac{1}{m} \sqrt{2M\epsilon}.$$

Therefore,

$$\|\mathbf{x}^{t+1} - \bar{\mathbf{x}}\| \leq \sqrt{2}\kappa\rho \|\mathbf{x}^t - \bar{\mathbf{x}}\| + \frac{3\kappa}{m} \|\nabla_{k+s} F(\bar{\mathbf{x}})\| + \frac{\sqrt{2M\epsilon}}{m}$$

We need to ensure

$$\sqrt{2}\kappa(1 - \eta m) < 1.$$

Let  $\eta = \eta'/M$  with  $\eta' < 1$ . Then, the above holds provided that

$$\kappa < 1 + \frac{1}{\sqrt{2}} \text{ and } \eta' > \kappa - \frac{1}{\sqrt{2}}.$$

By induction and picking proper  $\eta'$  to make  $\sqrt{2}\kappa(1 - \eta m) < \sqrt{2}/4$ , we have

$$\|\mathbf{x}^t - \bar{\mathbf{x}}\| \leq (\sqrt{2}(\kappa - \eta'))^t \|\mathbf{x}^0 - \bar{\mathbf{x}}\| + \frac{6\kappa}{m} \|\nabla_{k+s} F(\bar{\mathbf{x}})\| + \frac{4\sqrt{M\epsilon}}{m}.$$

□

**B.5. Proof for Prop. 5**

*Proof.* Our proof in this part is inspired by Yuan et al. (2016). Let  $\mathbf{x}_*^t = \arg \min_{\text{supp}(\mathbf{x}) \subset S^t} F(\mathbf{x})$ . Then

$$\begin{aligned} F(\mathbf{x}^t) - F(\mathbf{x}^{t-1}) &\leq F(\mathbf{x}_*^t) - F(\mathbf{x}^{t-1}) + \epsilon \\ &\leq F(\mathbf{b}_{S^t}^t) - F(\mathbf{x}^{t-1}) + \epsilon \\ &\leq -\frac{1-\eta M}{2\eta} \|\mathbf{b}_{S^t}^t - \mathbf{x}^{t-1}\|^2 + \epsilon, \end{aligned}$$

where the last inequality follows from Lemma 13. Now we bound the term  $\|\mathbf{b}_{S^t}^t - \mathbf{x}^{t-1}\|^2$ . Note that  $\mathbf{x}^{t-1}$  is supported on  $S^{t-1}$ . Hence,

$$\begin{aligned} \|\mathbf{b}_{S^t}^t - \mathbf{x}^{t-1}\|^2 &= \|\mathbf{x}_{S^t \cap S^{t-1}}^{t-1} - \eta \nabla_{S^t} F(\mathbf{x}^{t-1}) - \mathbf{x}^{t-1}\|^2 \\ &= \|\mathbf{x}_{S^t \setminus S^{t-1}}^{t-1} - \eta \nabla_{S^t} F(\mathbf{x}^{t-1})\|^2 \\ &= \|\mathbf{x}_{S^t \setminus S^{t-1}}^{t-1}\|^2 + \eta^2 \|\nabla_{S^t} F(\mathbf{x}^{t-1})\|^2 \\ &\geq \eta^2 \|\nabla_{S^t \setminus S^{t-1}} F(\mathbf{x}^{t-1})\|^2. \end{aligned}$$

We thus have

$$F(\mathbf{x}^t) - F(\mathbf{x}^{t-1}) \leq -\frac{(1-\eta M)\eta}{2} \|\nabla_{S^t \setminus S^{t-1}} F(\mathbf{x}^{t-1})\|^2 + \epsilon.$$

Denote  $\xi = \|\nabla_{S^{t-1}} F(\mathbf{x}^{t-1})\|$ . We claim that

$$\|\nabla_{S^t \setminus S^{t-1}} F(\mathbf{x}^{t-1})\|^2 \geq m (F(\mathbf{x}^{t-1}) - F(\bar{\mathbf{x}})) - 2\xi^2, \quad (9)$$

which, combined with Lemma 3, immediately shows

$$F(\mathbf{x}^t) - F(\mathbf{x}^{t-1}) \leq -\frac{(1-\eta M)\eta m}{2} (F(\mathbf{x}^{t-1}) - F(\bar{\mathbf{x}})) + 2\epsilon.$$

Using Lemma 15 completes the proof.

To show (9), we consider two exhaustive cases:  $|S^t \setminus S^{t-1}| \geq s$  and  $|S^t \setminus S^{t-1}| < s$ , and prove that (9) holds for both cases.

**Case I.**  $|S^t \setminus S^{t-1}| \geq s$ . Due to the RSC property, we have

$$\begin{aligned} &\frac{m}{2} \|\bar{\mathbf{x}} - \mathbf{x}^{t-1}\|^2 \\ &\leq F(\bar{\mathbf{x}}) - F(\mathbf{x}^{t-1}) - \langle \nabla F(\mathbf{x}^{t-1}), \bar{\mathbf{x}} - \mathbf{x}^{t-1} \rangle \\ &\leq F(\bar{\mathbf{x}}) - F(\mathbf{x}^{t-1}) + \frac{m}{2} \|\bar{\mathbf{x}} - \mathbf{x}^{t-1}\|^2 + \frac{1}{2m} \|\nabla_{S \cup S^{t-1}} F(\mathbf{x}^{t-1})\|^2 \\ &= F(\bar{\mathbf{x}}) - F(\mathbf{x}^{t-1}) + \frac{m}{2} \|\bar{\mathbf{x}} - \mathbf{x}^{t-1}\|^2 + \frac{1}{2m} \|\nabla_{S \setminus S^{t-1}} F(\mathbf{x}^{t-1})\|^2 + \frac{1}{2m} \|\nabla_{S^{t-1}} F(\mathbf{x}^{t-1})\|^2 \\ &= F(\bar{\mathbf{x}}) - F(\mathbf{x}^{t-1}) + \frac{m}{2} \|\bar{\mathbf{x}} - \mathbf{x}^{t-1}\|^2 + \frac{1}{2m} \|\nabla_{S \setminus S^{t-1}} F(\mathbf{x}^{t-1})\|^2 + \frac{1}{2m} \xi^2. \end{aligned}$$

Therefore, we get

$$\|\nabla_{S \setminus S^{t-1}} F(\mathbf{x}^{t-1})\|^2 \geq 2m (F(\mathbf{x}^{t-1}) - F(\bar{\mathbf{x}})) - \xi^2.$$

Since  $S^t$  contains the  $k$  largest absolute values of  $\mathbf{b}^t$ , and  $|S^t \setminus S^{t-1}| \geq s \geq |S \setminus S^{t-1}|$ , we have

$$\|\mathbf{b}_{S^t \setminus S^{t-1}}^t\|^2 \geq \|\mathbf{b}_{S \setminus S^{t-1}}^t\|^2,$$

which immediately implies (9) by noting the fact that  $\mathbf{b}_{S^t \setminus S^{t-1}}^t = -\eta \nabla_{S^t \setminus S^{t-1}} F(\mathbf{x}^{t-1})$  and  $\mathbf{b}_{S^t \setminus S^{t-1}}^t = -\eta \nabla_{S^t \setminus S^{t-1}} F(\mathbf{x}^{t-1})$ .

**Case II.**  $|S^t \setminus S^{t-1}| < s$ . Again, we use the RSC property to obtain

$$\begin{aligned}
 & \frac{m}{2} \|\bar{\mathbf{x}} - \mathbf{x}^{t-1}\|^2 \\
 & \leq F(\bar{\mathbf{x}}) - F(\mathbf{x}^{t-1}) - \langle \nabla F(\mathbf{x}^{t-1}), \bar{\mathbf{x}} - \mathbf{x}^{t-1} \rangle \\
 & \leq F(\bar{\mathbf{x}}) - F(\mathbf{x}^{t-1}) + \frac{m}{4} \|\bar{\mathbf{x}} - \mathbf{x}^{t-1}\|^2 + \frac{1}{m} \|\nabla_{S \cup S^{t-1}} F(\mathbf{x}^{t-1})\|^2 \\
 & = F(\bar{\mathbf{x}}) - F(\mathbf{x}^{t-1}) + \frac{m}{4} \|\bar{\mathbf{x}} - \mathbf{x}^{t-1}\|^2 + \frac{1}{m} \|\nabla_{S \setminus S^{t-1}} F(\mathbf{x}^{t-1})\|^2 + \frac{1}{m} \xi^2 \\
 & = F(\bar{\mathbf{x}}) - F(\mathbf{x}^{t-1}) + \frac{m}{4} \|\bar{\mathbf{x}} - \mathbf{x}^{t-1}\|^2 + \frac{1}{m} \|\nabla_{S \setminus (S^t \cup S^{t-1})} F(\mathbf{x}^{t-1})\|^2 \\
 & \quad + \frac{1}{m} \|\nabla_{(S^t \setminus S^{t-1}) \cap S} F(\mathbf{x}^{t-1})\|^2 + \frac{1}{m} \xi^2 \\
 & \leq F(\bar{\mathbf{x}}) - F(\mathbf{x}^{t-1}) + \frac{m}{4} \|\bar{\mathbf{x}} - \mathbf{x}^{t-1}\|^2 + \frac{1}{m} \|\nabla_{S \setminus (S^t \cup S^{t-1})} F(\mathbf{x}^{t-1})\|^2 \\
 & \quad + \frac{1}{m} \|\nabla_{S^t \setminus S^{t-1}} F(\mathbf{x}^{t-1})\|^2 + \frac{1}{m} \xi^2.
 \end{aligned} \tag{10}$$

We consider the term  $\|\nabla_{S \setminus (S^t \cup S^{t-1})} F(\mathbf{x}^{t-1})\|^2$  above. Actually, we have

$$\mathbf{b}_{S \setminus (S^t \cup S^{t-1})}^t = -\eta \nabla_{S \setminus (S^t \cup S^{t-1})} F(\mathbf{x}^{t-1}).$$

Since  $S^t$  contains the  $k$  largest absolute values of  $\mathbf{b}^t$ , we know that any component in  $\mathbf{b}_{\Omega}^t$  is not larger than that in  $\mathbf{b}_{S^t}^t$  subject to  $\Omega \cap S^t = \emptyset$ . In particular,

$$\frac{\|\mathbf{b}_{S \setminus (S^t \cup S^{t-1})}^t\|^2}{|S \setminus (S^t \cup S^{t-1})|} \leq \frac{\|\mathbf{b}_{(S^t \cap S^{t-1}) \setminus S}^t\|^2}{|(S^t \cap S^{t-1}) \setminus S|}.$$

Note that  $|S^t \setminus S^{t-1}| < s$  implies  $|(S^t \cap S^{t-1}) \setminus S| \geq k - 2s$ . Therefore,

$$\begin{aligned}
 & \eta^2 \|\nabla_{S \setminus (S^t \cup S^{t-1})} F(\mathbf{x}^{t-1})\|^2 \\
 & \leq \frac{s}{k - 2s} \left\| \mathbf{x}_{(S^t \cap S^{t-1}) \setminus S}^{t-1} - \eta \nabla_{(S^t \cap S^{t-1}) \setminus S} F(\mathbf{x}^{t-1}) \right\|^2 \\
 & \leq \frac{2s}{k - 2s} \left\| \mathbf{x}_{(S^t \cap S^{t-1}) \setminus S}^{t-1} \right\|^2 + \frac{2s\eta^2}{k - 2s} \xi^2 \\
 & = \frac{2s}{k - 2s} \left\| (\mathbf{x}^{t-1} - \bar{\mathbf{x}})_{(S^t \cap S^{t-1}) \setminus S} \right\|^2 + \frac{2s\eta^2}{k - 2s} \xi^2 \\
 & \leq \frac{2s}{k - 2s} \|\mathbf{x}^{t-1} - \bar{\mathbf{x}}\|^2 + \frac{2s\eta^2}{k - 2s} \xi^2.
 \end{aligned}$$

Plugging the above into (10), we obtain

$$\begin{aligned}
 \frac{m}{2} \|\bar{\mathbf{x}} - \mathbf{x}^{t-1}\|^2 & \leq F(\bar{\mathbf{x}}) - F(\mathbf{x}^{t-1}) + \frac{m}{4} \|\bar{\mathbf{x}} - \mathbf{x}^{t-1}\|^2 + \frac{2s}{(k - 2s)\eta^2 m} \|\bar{\mathbf{x}} - \mathbf{x}^{t-1}\|^2 \\
 & \quad + \frac{1}{m} \|\nabla_{S^t \setminus S^{t-1}} F(\mathbf{x}^{t-1})\|^2 + \frac{1}{m} \left( \frac{2s}{k - 2s} + 1 \right) \xi^2.
 \end{aligned}$$

Picking  $k \geq 2s + \frac{8s}{\eta^2 m^2}$  gives

$$\begin{aligned}
 \frac{m}{2} \|\bar{\mathbf{x}} - \mathbf{x}^{t-1}\|^2 & \leq F(\bar{\mathbf{x}}) - F(\mathbf{x}^{t-1}) + \frac{m}{2} \|\bar{\mathbf{x}} - \mathbf{x}^{t-1}\|^2 \\
 & \quad + \frac{1}{m} \|\nabla_{S^t \setminus S^{t-1}} F(\mathbf{x}^{t-1})\|^2 + \left( \frac{\eta^2 m}{4} + \frac{1}{m} \right) \xi^2.
 \end{aligned}$$

Since  $\eta < 1/M$ ,  $\frac{\eta^2 m}{4} + 1 < 2$ . Therefore, by re-arranging the above inequality, we prove the claim (9).  $\square$

### C. Proofs for Section 3

The following result holds for all  $F(\mathbf{x})$ .

**Lemma 18.** *Assume (A1) and (A2). For any  $k$ -sparse vector  $\mathbf{x}$  and  $s$ -sparse vector  $\bar{\mathbf{x}}$ , we have*

$$\|\mathbf{x} - \bar{\mathbf{x}}\| \leq \kappa \|\bar{\mathbf{x}}_T\| + \frac{1}{m} \|\nabla_T F(\mathbf{x}) - \nabla_T F(\bar{\mathbf{x}})\|,$$

where  $T$  is the support set of  $\mathbf{x}$ .

*Proof.*

$$\begin{aligned} \|(\mathbf{x} - \bar{\mathbf{x}})_T\|^2 &= \langle \mathbf{x} - \bar{\mathbf{x}} - \tau \nabla F(\mathbf{x}) + \tau \nabla F(\bar{\mathbf{x}}), (\mathbf{x} - \bar{\mathbf{x}})_T \rangle + \tau \langle \nabla F(\mathbf{x}) - \nabla F(\bar{\mathbf{x}}), (\mathbf{x} - \bar{\mathbf{x}})_T \rangle \\ &\leq \|(\mathbf{x} - \bar{\mathbf{x}} - \tau \nabla F(\mathbf{x}) + \tau \nabla F(\bar{\mathbf{x}}))_T\| \cdot \|(\mathbf{x} - \bar{\mathbf{x}})_T\| + \tau \|\nabla_T F(\mathbf{x}) - \nabla_T F(\bar{\mathbf{x}})\| \cdot \|(\mathbf{x} - \bar{\mathbf{x}})_T\| \\ &\leq \|\mathbf{x} - \bar{\mathbf{x}} - \tau \nabla_{T \cup S} F(\mathbf{x}) + \tau \nabla_{T \cup S} F(\bar{\mathbf{x}})\| \cdot \|(\mathbf{x} - \bar{\mathbf{x}})_T\| + \tau \|\nabla_T F(\mathbf{x}) - \nabla_T F(\bar{\mathbf{x}})\| \cdot \|(\mathbf{x} - \bar{\mathbf{x}})_T\| \\ &\leq \rho \|\mathbf{x} - \bar{\mathbf{x}}\| \cdot \|(\mathbf{x} - \bar{\mathbf{x}})_T\| + \tau \|\nabla_T F(\mathbf{x}) - \nabla_T F(\bar{\mathbf{x}})\| \cdot \|(\mathbf{x} - \bar{\mathbf{x}})_T\|. \end{aligned}$$

Dividing both sides by  $\|(\mathbf{x} - \bar{\mathbf{x}})_T\|$  gives

$$\|(\mathbf{x} - \bar{\mathbf{x}})_T\| \leq \rho \|\mathbf{x} - \bar{\mathbf{x}}\| + \tau \|\nabla_T F(\mathbf{x}) - \nabla_T F(\bar{\mathbf{x}})\|.$$

On the other hand,

$$\begin{aligned} \|\mathbf{x} - \bar{\mathbf{x}}\| &\leq \|(\mathbf{x} - \bar{\mathbf{x}})_T\| + \|(\mathbf{x} - \bar{\mathbf{x}})_{\bar{T}}\| \\ &\leq \rho \|\mathbf{x} - \bar{\mathbf{x}}\| + \tau \|\nabla_T F(\mathbf{x}) - \nabla_T F(\bar{\mathbf{x}})\| + \|\bar{\mathbf{x}}_{\bar{T}}\|. \end{aligned}$$

Hence, we have

$$\|\mathbf{x} - \bar{\mathbf{x}}\| \leq \frac{1}{1-\rho} \|\bar{\mathbf{x}}_{\bar{T}}\| + \frac{\tau}{1-\rho} \|\nabla_T F(\mathbf{x}) - \nabla_T F(\bar{\mathbf{x}})\|.$$

Picking  $\tau = 1/M$  completes the proof.  $\square$

In view of the exact (HTP3), we have

$$\|\mathbf{x}^t - \bar{\mathbf{x}}\| \leq \kappa \|\bar{\mathbf{x}}_{S^t}\| + \frac{1}{m} \|\nabla_k F(\bar{\mathbf{x}})\|. \quad (11)$$

Now we present the crucial lemma. It is inspired by Bouchot et al. (2016) but we show a more general result.

**Lemma 19.** *Consider the HTP algorithm. Assume (A1) and (A2). Further assume that the sequence of  $\{\mathbf{x}^t\}_{t \geq 0}$  satisfies*

$$\begin{aligned} \|\mathbf{x}^t - \bar{\mathbf{x}}\| &\leq \alpha \cdot \beta^t \|\mathbf{x}^0 - \bar{\mathbf{x}}\| + \phi, \\ \|\mathbf{x}^t - \bar{\mathbf{x}}\| &\leq \gamma \|\bar{\mathbf{x}}_{S^t}\| + \psi, \end{aligned}$$

for positive  $\alpha, \phi, \gamma, \psi$  and  $0 < \beta < 1$ . Suppose that at the  $n$ -th iteration ( $n \geq 0$ ),  $S^n$  contains the indices of top  $p$  (in magnitude) elements of  $\bar{\mathbf{x}}$ . Then, for any integer  $1 \leq q \leq s - p$ , there exists an integer  $r \geq 1$  determined by

$$\sqrt{2} \|\bar{\mathbf{x}}_{p+q}\| > \alpha \gamma \cdot \beta^{r-1} \|\bar{\mathbf{x}}_{\{p+1, \dots, s\}}\| + \theta$$

where

$$\theta = \alpha \psi + \phi + \frac{1}{m} \|\nabla_2 F(\bar{\mathbf{x}})\|,$$

such that  $S^{n+r}$  contains the indices of top  $p + q$  elements of  $\bar{\mathbf{x}}$  provided that  $\theta \leq \sqrt{2} \lambda \bar{\mathbf{x}}_{\min}$  for some  $\lambda \in (0, 1)$ .

*Proof.* Without loss of generality, we presume that the elements in  $\bar{\mathbf{x}}$  are in descending order by their magnitude, i.e.,  $|\bar{\mathbf{x}}_1| \geq |\bar{\mathbf{x}}_2| \geq \dots \geq |\bar{\mathbf{x}}_s|$ . We aim at deriving a condition under which  $[p+q] \subset \mathcal{S}^{n+r}$ . To this end, it suffices to enforce

$$\min_{j \in [p+q]} |\mathbf{b}_j^{n+r}| > \max_{i \in \bar{\mathcal{S}}} |\mathbf{b}_i^{n+r}|. \quad (12)$$

On one hand, for any  $j \in [p+q]$ ,

$$\begin{aligned} |\mathbf{b}_j^{n+r}| &= \left| (\mathbf{x}^{n+r-1} - \eta \nabla F(\mathbf{x}^{n+r-1}))_j \right| \\ &\geq |\bar{\mathbf{x}}_j| - \left| (\mathbf{x}^{n+r-1} - \bar{\mathbf{x}} - \eta \nabla F(\mathbf{x}^{n+r-1}))_j \right| \\ &\geq |\bar{\mathbf{x}}_{p+q}| - \left| (\mathbf{x}^{n+r-1} - \bar{\mathbf{x}} - \eta \nabla F(\mathbf{x}^{n+r-1}))_j \right|. \end{aligned}$$

On the other hand, for all  $i \in \bar{\mathcal{S}}$ ,

$$|\mathbf{b}_i^{n+r}| = \left| (\mathbf{x}^{n+r-1} - \bar{\mathbf{x}} - \eta \nabla F(\mathbf{x}^{n+r-1}))_i \right|.$$

Hence, we know that to guarantee (12), it suffices to ensure for all  $j \in [p+q]$  and  $i \in \bar{\mathcal{S}}$  that

$$|\bar{\mathbf{x}}_{p+q}| > \left| (\mathbf{x}^{n+r-1} - \bar{\mathbf{x}} - \eta \nabla F(\mathbf{x}^{n+r-1}))_j \right| + \left| (\mathbf{x}^{n+r-1} - \bar{\mathbf{x}} - \eta \nabla F(\mathbf{x}^{n+r-1}))_i \right|.$$

Note that the right-hand side is upper bounded as follows:

$$\begin{aligned} &\frac{1}{\sqrt{2}} \left| (\mathbf{x}^{n+r-1} - \bar{\mathbf{x}} - \eta \nabla F(\mathbf{x}^{n+r-1}))_j \right| + \frac{1}{\sqrt{2}} \left| (\mathbf{x}^{n+r-1} - \bar{\mathbf{x}} - \eta \nabla F(\mathbf{x}^{n+r-1}))_i \right| \\ &\leq \left\| (\mathbf{x}^{n+r-1} - \bar{\mathbf{x}} - \eta \nabla F(\mathbf{x}^{n+r-1}))_{\{j,i\}} \right\| \\ &\leq \left\| (\mathbf{x}^{n+r-1} - \bar{\mathbf{x}} - \eta \nabla F(\mathbf{x}^{n+r-1}) + \eta \nabla F(\bar{\mathbf{x}}))_{\{j,i\}} \right\| + \eta \|\nabla_{\{j,i\}} F(\bar{\mathbf{x}})\| \\ &\leq \rho \|\mathbf{x}^{n+r-1} - \bar{\mathbf{x}}\| + \eta \|\nabla_2 F(\bar{\mathbf{x}})\| \\ &\leq \rho \alpha \cdot \beta^{r-1} \|\mathbf{x}^n - \bar{\mathbf{x}}\| + \rho \phi + \eta \|\nabla_2 F(\bar{\mathbf{x}})\|. \end{aligned}$$

Moreover,

$$\|\mathbf{x}^n - \bar{\mathbf{x}}\| \leq \gamma \|\bar{\mathbf{x}}_{\bar{\mathcal{S}}^n}\| + \psi \leq \gamma \|\bar{\mathbf{x}}_{[p]}\| + \psi = \gamma \|\bar{\mathbf{x}}_{\{p+1, \dots, s\}}\| + \psi.$$

Put all together, we have

$$\begin{aligned} &\frac{1}{\sqrt{2}} \left| (\mathbf{x}^{n+r-1} - \bar{\mathbf{x}} - \eta \nabla F(\mathbf{x}^{n+r-1}))_j \right| + \frac{1}{\sqrt{2}} \left| (\mathbf{x}^{n+r-1} - \bar{\mathbf{x}} - \eta \nabla F(\mathbf{x}^{n+r-1}))_i \right| \\ &\leq \rho \alpha \gamma \cdot \beta^{r-1} \|\bar{\mathbf{x}}_{\{p+1, \dots, s\}}\| + \rho \alpha \psi + \rho \phi + \eta \|\nabla_2 F(\bar{\mathbf{x}})\| \\ &\leq \alpha \gamma \cdot \beta^{r-1} \|\bar{\mathbf{x}}_{\{p+1, \dots, s\}}\| + \alpha \psi + \phi + \frac{1}{m} \|\nabla_2 F(\bar{\mathbf{x}})\|. \end{aligned}$$

Therefore, when

$$\sqrt{2} |\bar{\mathbf{x}}_{p+q}| > \alpha \gamma \cdot \beta^{r-1} \|\bar{\mathbf{x}}_{\{p+1, \dots, s\}}\| + \alpha \psi + \phi + \frac{1}{m} \|\nabla_2 F(\bar{\mathbf{x}})\|,$$

we always have (12). Note that the above holds as far as  $\alpha \psi + \phi + \frac{1}{m} \|\nabla_2 F(\bar{\mathbf{x}})\|$  is strictly smaller than  $\sqrt{2} |\bar{\mathbf{x}}_s|$ .  $\square$

With Lemma 19, we show the following general theorem.

**Theorem 20.** *Assume same conditions as in Lemma 19. Then HTP successfully identifies the support of  $\bar{\mathbf{x}}$  using  $\left( \frac{\log 2}{2 \log(1/\beta)} + \frac{\log(\alpha \gamma / (1-\lambda))}{\log(1/\beta)} + 2 \right) s$  number of iterations.*

*Proof.* Without loss of generality, we presume that the elements in  $\bar{\mathbf{x}}$  are in descending order by their magnitude, i.e.,  $|\bar{\mathbf{x}}_1| \geq |\bar{\mathbf{x}}_2| \geq \dots \geq |\bar{\mathbf{x}}_s|$ . We partition the support set  $[s]$  into  $K$  folds  $S_1, S_2, \dots, S_K$ , where each  $S_i$  is defined as follows:

$$S_i = \{s_{i-1} + 1, \dots, s_i\}, \forall 1 \leq i \leq K.$$

Here,  $s_0 = 0$  and for all  $1 \leq i \leq K$ , the quantity  $s_i$  is inductively given by

$$s_i = \max \left\{ q : s_{i-1} + 1 \leq q \leq s \text{ and } |\bar{\mathbf{x}}_q| > \frac{1}{\sqrt{2}} |\bar{\mathbf{x}}_{s_{i-1}+1}| \right\}.$$

In this way, we note that for any two index sets  $S_i$  and  $S_j$ ,  $S_i \cap S_j = \emptyset$  if  $i \neq j$ . We also know by the definition of  $s_i$  that

$$|\bar{\mathbf{x}}_{s_i+1}| \leq \frac{1}{\sqrt{2}} |\bar{\mathbf{x}}_{s_{i-1}+1}|, \forall 1 \leq i \leq K - 1. \quad (13)$$

Now we show that after a finite number of iterations, say  $n$ , the union of the  $S_i$ 's is contained in  $S^n$ . To this end, we prove that for all  $0 \leq i \leq K$ ,

$$\bigcup_{t=0}^i S_t \subset S^{n_0+n_1+\dots+n_i} \quad (14)$$

for some  $n_i$ 's given below.

We pick  $n_0 = 0$  and it is easy to verify that  $S_0 \subset S^0$ . Now suppose that (14) holds for  $i - 1$ . That is, the index set of the top  $s_{i-1}$  elements of  $\bar{\mathbf{x}}$  is contained in  $S^{n_0+\dots+n_{i-1}}$ . Due to Lemma 19, (14) holds for  $i$  as long as  $n_i$  satisfies

$$\sqrt{2} |\bar{\mathbf{x}}_{s_i}| > \alpha\gamma \cdot \beta^{n_i-1} \|\bar{\mathbf{x}}_{\{s_{i-1}+1, \dots, s\}}\| + \theta. \quad (15)$$

Note that

$$\begin{aligned} \|\bar{\mathbf{x}}_{\{s_{i-1}+1, \dots, s\}}\|^2 &= \|\bar{\mathbf{x}}_{S_i}\|^2 + \dots + \|\bar{\mathbf{x}}_{S_K}\|^2 \\ &\leq (\bar{\mathbf{x}}_{s_{i-1}+1})^2 |S_i| + \dots + (\bar{\mathbf{x}}_{s_{r-1}+1})^2 |S_K| \\ &\leq (\bar{\mathbf{x}}_{s_{i-1}+1})^2 (|S_i| + 2^{-1} |S_{i+1}| + \dots + 2^{i-K} |S_K|) \\ &< 2(\bar{\mathbf{x}}_{s_i})^2 (|S_i| + 2^{-1} |S_{i+1}| + \dots + 2^{i-K} |S_K|), \end{aligned}$$

where the second inequality follows from (13) and the last inequality follows from the definition of  $q_i$ . Denote for simplicity

$$T_i := |S_i| + 2^{-1} |S_{i+1}| + \dots + 2^{i-K} |S_K|.$$

As we assume  $\theta \leq \sqrt{2}\lambda\bar{\mathbf{x}}_{\min}$ , we get

$$\alpha\gamma \cdot \beta^{n_i-1} \|\bar{\mathbf{x}}_{\{s_{i-1}+1, \dots, s\}}\| + \theta < \sqrt{2}\alpha\gamma |\bar{\mathbf{x}}_{s_i}| \beta^{n_i-1} \sqrt{T_i} + \sqrt{2}\lambda |\bar{\mathbf{x}}_{s_i}|.$$

Picking

$$n_i = \log_{1/\beta} \frac{\alpha\gamma\sqrt{T_i}}{1-\lambda} + 2$$

guarantees (15). It remains to calculate the total number of iterations. In fact, we have

$$\begin{aligned}
 n &= n_0 + n_1 + \dots + n_K \\
 &= \frac{1}{2 \log(1/\beta)} \sum_{i=1}^K \log T_i + K \cdot \frac{\log(\alpha\gamma/(1-\lambda))}{\log(1/\beta)} + 2K \\
 &\stackrel{\zeta_1}{\leq} \frac{K}{2 \log(1/\beta)} \log \left( \frac{1}{K} \sum_{i=1}^K T_i \right) + \left( \frac{\log(\alpha\gamma/(1-\lambda))}{\log(1/\beta)} + 2 \right) K \\
 &\stackrel{\zeta_2}{\leq} \frac{K}{2 \log(1/\beta)} \log \left( \frac{2}{K} \sum_{i=1}^K |S_i| \right) + \left( \frac{\log(\alpha\gamma/(1-\lambda))}{\log(1/\beta)} + 2 \right) K \\
 &= \frac{K}{2 \log(1/\beta)} \log \frac{2s}{K} + \left( \frac{\log(\alpha\gamma/(1-\lambda))}{\log(1/\beta)} + 2 \right) K \\
 &\stackrel{\zeta_3}{\leq} \left( \frac{\log 2}{2 \log(1/\beta)} + \frac{\log(\alpha\gamma/(1-\lambda))}{\log(1/\beta)} + 2 \right) s.
 \end{aligned}$$

Above,  $\zeta_1$  immediately follows by observing that the logarithmic function is concave.  $\zeta_2$  uses the fact that after rearrangement, the coefficient of  $|S_i|$  is  $\sum_{j=0}^{i-1} 2^{-j}$  which is always smaller than 2. Finally, since the function  $r \log(2s/r)$  is monotonically increasing with respect to  $r$  and  $1 \leq r \leq s$ ,  $\zeta_3$  follows.  $\square$

Combining this theorem, Lemma 19 and specific results in Prop. 2, Prop. 4 and Prop. 5 gives the main theorems in Section 3.
